# Supplementary material for: Canopy area of large trees explains aboveground biomass variations across neotropical forest landscapes
Source: Copernicus journal article supplement (doi:10.5194/bg-15-3377-2018), 2018-06-08
Supplement: Supplementary file 1 [file bg-15-3377-2018-supplement.pdf]

Supplement of Biogeosciences, 15, 3377–3390, 2018  
<https://doi.org/10.5194/bg-15-3377-2018-supplement>  
© Author(s) 2018. This work is distributed under  
the Creative Commons Attribution 4.0 License.

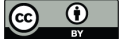

*Supplement of*

## **Canopy area of large trees explains aboveground biomass variations across neotropical forest landscapes**

**Victoria Meyer et al.**

*Correspondence to:* Victoria Meyer ([victoria.meyer@jpl.nasa.com](mailto:victoria.meyer@jpl.nasa.com))

The copyright of individual parts of the supplement might differ from the CC BY 4.0 License.

1

2

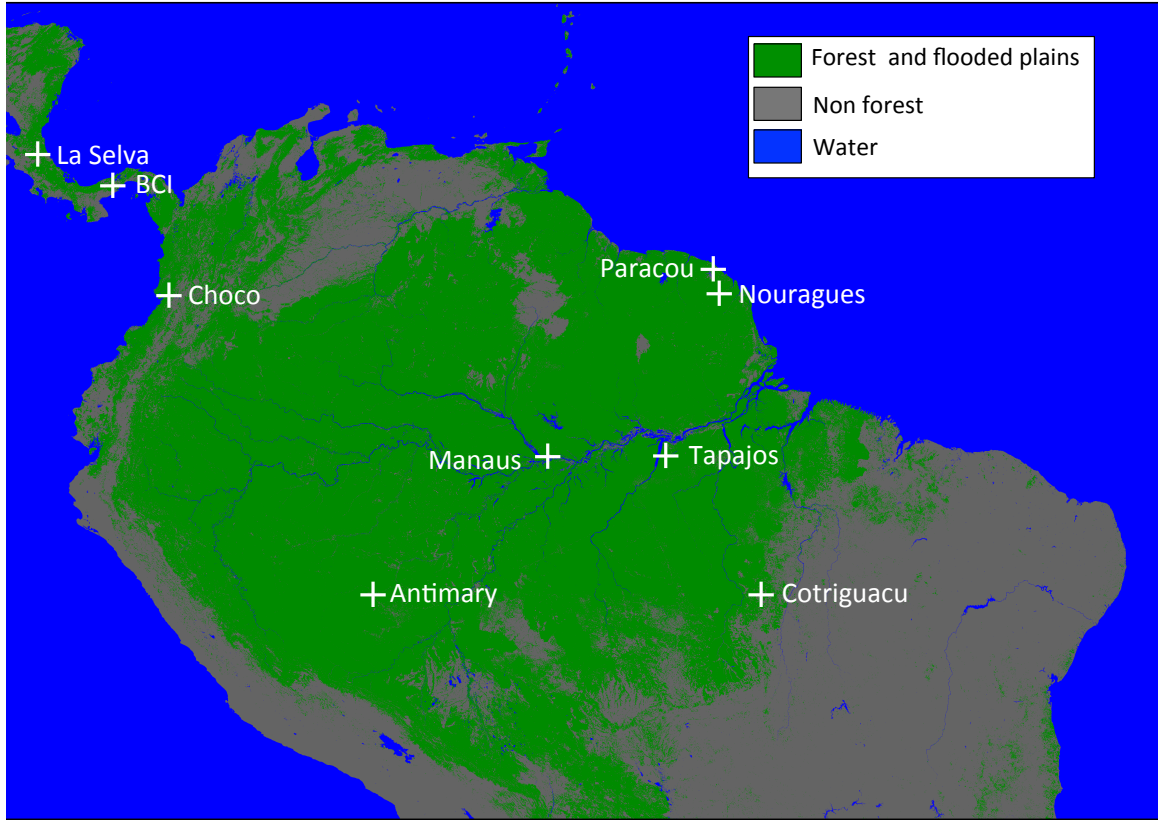

3

4

5

**Figure S1.** Location of the nine study sites (GlobeCover). All sites are located in old growth tropical forests.

6

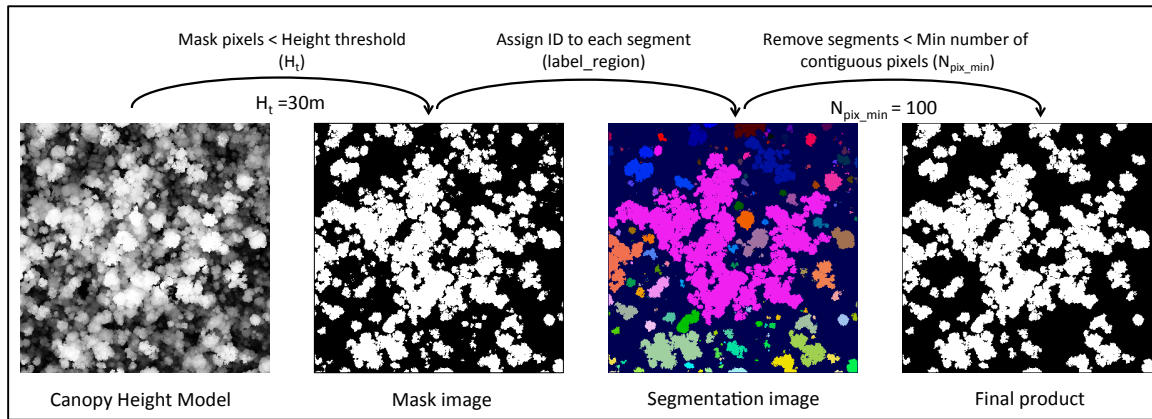

7

8 **Figure S2.** Description of steps taken from the original Lidar canopy height model to the final LCA product. This  
9 example is a 400 m by 400 m area in BCI, with a height threshold of 30 m and the minimum number of contiguous  
10 pixels set to 100.

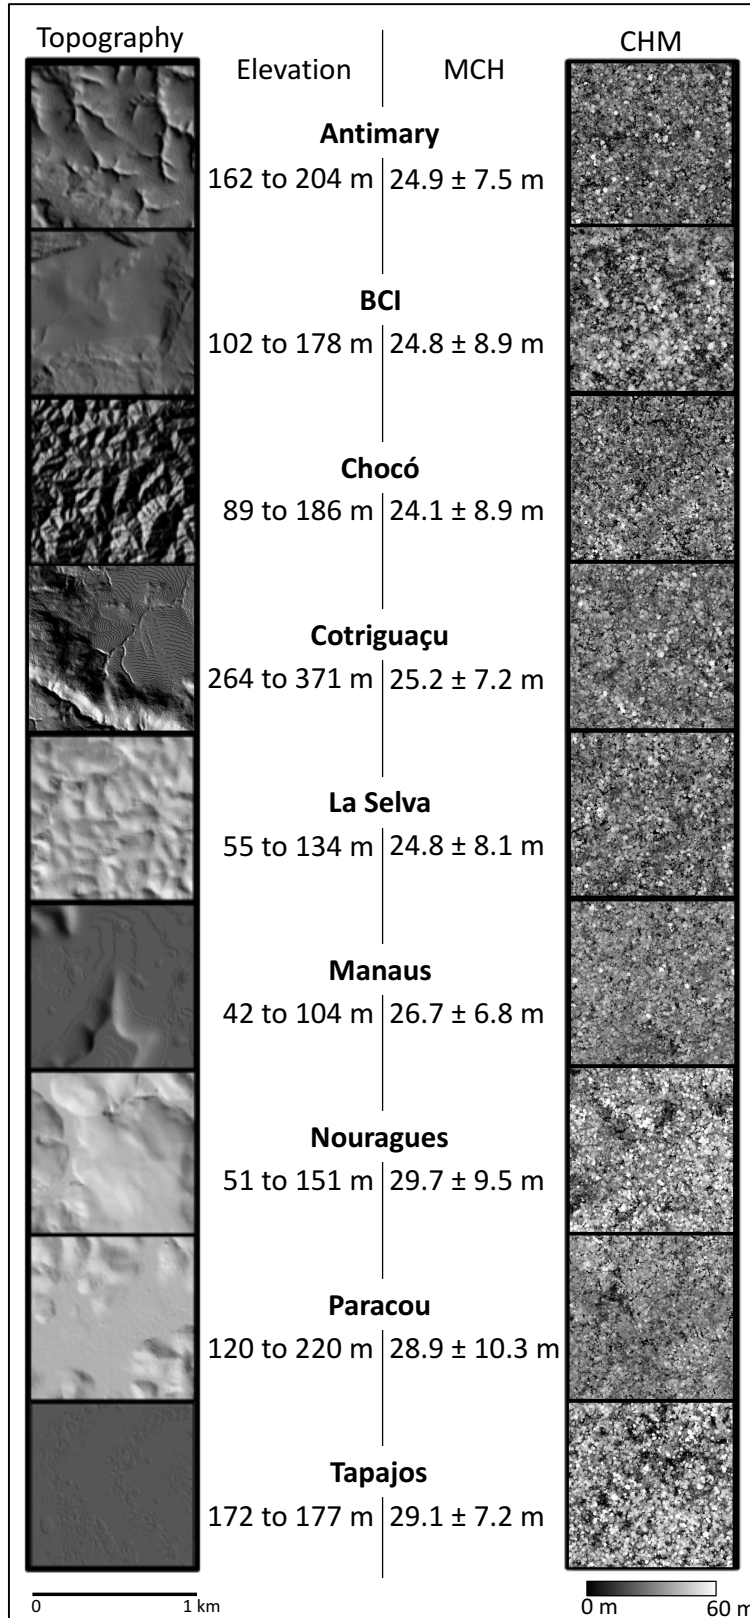

11  
12  
13  
14

**Figure S3.** Lidar derived images: shaded relief of topography and canopy height model (CHM), at 1 m resolution. Mean canopy height (MCH), standard deviation of canopy height and elevation range are reported.

## 15 **S.1 Estimating aboveground biomass from forest inventories.**

16  
17 For trees with no height measurement, a site specific DBH height model was used to infer tree  
18 height in each site, as described in previous studies (Feldpausch et al., 2012; Meyer et al., 2013).  
19 Wood density ( $WD$ ) was extracted from the global wood density database for tropical trees  
20 (Chave et al., 2009; Zanne et al., 2009) for each tree, based on its level of botanical identification  
21 (species, genus, family). Trees with no botanical identification were assigned the average  $WD$  of  
22 the plot. Average  $WD$  of each site was calculated as the unweighted average of all trees within a  
23 site, or was taken from a previous study in the case of Cotriguaçu (Fearnside, 1997).  
24 Average  $WD$  of large trees was calculated as the unweighted average of trees with  $DBH \geq 50$  cm  
25 in each site. Tree level AGB was aggregated at the plot level using a commonly used allometric  
26 regression model for moist tropical forests (Eq. (S1), Chave et al., 2005), except for La Selva and  
27 Chocó, for which a model for wet tropical forest (Eq. (S2), Chave et al., 2005) and a local  
28 allometric model (Eq. (S3), Duque et al., 2017) were used, respectively.

$$29 \quad AGB_{moist} = 0.0509 \times WD \times DBH^2 \times H \quad (S1)$$

$$30 \quad AGB_{wet} = 0.0776 \times (WD \times DBH^2 \times H)^{0.940} \quad (S2)$$

$$31 \quad AGB_{Chocó} = 0.089 \times (WD \times DBH^2 \times H)^{0.951} \quad (S3)$$

32 where trunk diameter ( $DBH$  in cm) is measured during the inventory, tree height ( $H$ , in m) is  
33 either measured in the field or estimated from a local  $DBH$ – $H$  model, and specific gravity or  
34 wood density ( $WD$  in  $g\ cm^{-3}$ ) is known for each tree. AGB (in kg of dry biomass) of individual  
35 trees estimated using the former equations was used to calculate plot level AGB density ( $Mg\ ha^{-1}$ )  
36 <sup>1</sup>) by summing over the biomass of all stems within each plot. Ground estimated AGB density is  
37 henceforth referred to as  $AGB_{inv}$ . Estimating AGB with these allometric models has been  
38 reported to have a standard error of 12.5 % when using height as a parameter, against 19.5 %

39 when height is not available (Chave et al., 2005).

40

## 41 **S.2 Local estimates of AGB using MCH**

42 We estimated AGB locally for each of the nine sites in order to find the best height threshold for  
43 LCA in all sites, in addition to the information provided by the four calibration sites (see Fig. 3).  
44 Mean canopy height (MCH) is a good predictor of AGB provided that the regression model is  
45 calibrated locally. It was calculated by averaging all the canopy height model pixels falling in an  
46 area of interest. Here, we calculated a locally calibrated AGB map of each site from MCH using  
47 the following model form (Eq. (3), Asner and Mascaro, 2014).

$$48 \quad AGB_{Local} = aMCH^b + \epsilon \quad (S4)$$

49 where  $AGB_{Local}$  is the aboveground biomass estimation derived from Lidar data,  $a$  is a scaling  
50 constant, which is expected to depend significantly on forest type and stand level WD,  $b$  is a  
51 power law exponent and  $\epsilon \sim N(0, \sigma^2)$  represents the uncertainty in measurements. All  
52 coefficients are presented in Table S1. We inferred the model parameters directly for the sites  
53 where  $AGB_{inv}$  of 1 ha plots was available (La Selva, BCI, Paracou and Nouragues). For Chocó  
54 and Antimary, we developed models based on 0.25 ha plots and 50 m x 50 m pixels of Lidar data  
55 and after estimating  $AGB_{Local}$ , aggregated the image to 1 ha or 100 m pixels. For the remaining  
56 sites of the Central Amazon (Cotriguaçu, Manaus and Tapajós), we developed a model based on  
57 existing data in Manaus and Tapajós from a previous study, derived from airborne and  
58 spaceborne Lidar (see Lefsky et al., 2007). This model may have larger uncertainty in estimating  
59 biomass compared to our site specific model, but we here assume that all 1 ha scale  $AGB_{Local}$   
60 estimates have approximately similar uncertainties.

61  
62  
63  
64  
65  
66

67 **Table S1.** Coefficients,  $R^2$  and RMSE for the local models used to estimate AGB from MCH in the different sites,  
 68 based on available ground data.

| Site       | a       | b      | $R^2$ | RMSE  | plot size |
|------------|---------|--------|-------|-------|-----------|
| Antimary   | 0.1687  | 2.2544 | 0.62  | 45.30 | 0.25      |
| BCI        | 2.3257  | 1.4336 | 0.68  | 28.14 | 1         |
| Chocó      | 10.7328 | 1.0509 | 0.66  | 33.34 | 0.25      |
| Cotriguacu | 3.0249  | 1.3895 | -     | -     | -         |
| La Selva   | 2.1241  | 1.3889 | 0.84  | 11.45 | 1         |
| Manaus     | 3.0249  | 1.3895 | 0.59  | 43.73 | 0.25      |
| Nouragues  | 5.7963  | 1.242  | 0.46  | 59.19 | 1         |
| Paracou    | 5.707   | 1.239  | 0.58  | 40.49 | 1         |
| Tapajos    | 3.0249  | 1.3895 | 0.59  | 43.73 | 0.25      |

69

70

71



72 **Table S2.** Matrices of canopy height thresholds (20 m to 50 m, presented with a 5 m increment for readability  
73 purposes) and crown area thresholds (50 to 200 pixels or m<sup>2</sup>), represented respectively by the minimum height  
74 considered for segmentation and by the minimum number of contiguous 1m pixels in a segment. Values are given in  
75 percentage of coverage of the 1km<sup>2</sup> subsets.

| Site       | Number of pixels | 20 m<br>threshold | 25 m<br>threshold | 30 m<br>threshold | 35 m<br>threshold | 40 m<br>threshold | 45 m<br>threshold | 50 m<br>threshold |
|------------|------------------|-------------------|-------------------|-------------------|-------------------|-------------------|-------------------|-------------------|
| Antimary   | 50               | 75.30             | 48.32             | 22.19             | 8.23              | 2.12              | 0.46              | 0.06              |
|            | 100              | 75.03             | 47.40             | 20.92             | 7.64              | 1.92              | 0.43              | 0.05              |
|            | 150              | 74.84             | 46.55             | 19.82             | 7.03              | 1.75              | 0.41              | 0.04              |
|            | 200              | 74.81             | 45.89             | 18.93             | 6.33              | 1.60              | 0.34              | 0.04              |
| BCI        | 50               | 70.06             | 51.53             | 29.19             | 11.66             | 2.51              | 0.25              | 0.05              |
|            | 100              | 69.79             | 50.92             | 28.21             | 11.08             | 2.30              | 0.21              | 0.05              |
|            | 150              | 69.48             | 50.38             | 27.44             | 10.52             | 2.06              | 0.17              | 0.05              |
|            | 200              | 69.35             | 49.96             | 26.67             | 10.06             | 1.95              | 0.16              | 0.05              |
| Chocó      | 50               | 70.48             | 48.64             | 23.22             | 7.72              | 1.88              | 0.24              | 0.02              |
|            | 100              | 70.20             | 47.58             | 21.31             | 6.45              | 1.53              | 0.18              | 0.00              |
|            | 150              | 69.97             | 46.81             | 19.83             | 5.52              | 1.17              | 0.09              | 0.00              |
|            | 200              | 69.84             | 46.05             | 18.19             | 4.83              | 0.94              | 0.06              | 0.00              |
| Cotriguaçu | 50               | 80.07             | 53.85             | 25.93             | 8.12              | 1.65              | 0.24              | 0.02              |
|            | 100              | 79.91             | 52.87             | 24.70             | 7.33              | 1.43              | 0.21              | 0.02              |
|            | 150              | 79.85             | 52.08             | 23.23             | 6.48              | 1.26              | 0.18              | 0.02              |
|            | 200              | 79.84             | 51.71             | 21.92             | 5.70              | 1.12              | 0.18              | 0.02              |
| La Selva   | 50               | 74.32             | 50.22             | 24.00             | 7.88              | 1.95              | 0.27              | 0.06              |
|            | 100              | 74.15             | 49.30             | 22.71             | 7.17              | 1.70              | 0.25              | 0.05              |
|            | 150              | 74.05             | 48.69             | 21.57             | 6.55              | 1.47              | 0.21              | 0.05              |
|            | 200              | 74.01             | 48.03             | 20.57             | 6.01              | 1.22              | 0.11              | 0.03              |
| Manaus     | 50               | 86.07             | 66.42             | 33.69             | 9.02              | 1.63              | 0.41              | 0.08              |
|            | 100              | 86.04             | 65.99             | 32.72             | 7.91              | 1.48              | 0.38              | 0.07              |
|            | 150              | 86.03             | 65.69             | 31.20             | 6.99              | 1.17              | 0.34              | 0.03              |
|            | 200              | 86.00             | 65.51             | 29.87             | 6.08              | 1.05              | 0.32              | 0.03              |
| Nouragues  | 50               | 85.14             | 69.77             | 48.77             | 28.82             | 13.34             | 4.05              | 0.79              |
|            | 100              | 85.05             | 69.37             | 47.86             | 27.73             | 12.45             | 3.56              | 0.60              |
|            | 150              | 84.93             | 69.16             | 47.23             | 26.67             | 11.41             | 3.02              | 0.44              |
|            | 200              | 84.89             | 68.87             | 46.62             | 25.73             | 10.30             | 2.51              | 0.29              |
| Paracou    | 50               | 84.56             | 63.40             | 31.82             | 9.56              | 1.83              | 0.17              | 0.00              |
|            | 100              | 84.50             | 62.90             | 30.18             | 8.47              | 1.46              | 0.10              | 0.00              |
|            | 150              | 84.46             | 62.43             | 28.64             | 7.36              | 1.10              | 0.05              | 0.00              |
|            | 200              | 84.42             | 62.18             | 27.61             | 6.30              | 0.82              | 0.23              | 0.00              |
| Tapajós    | 50               | 79.61             | 66.61             | 51.61             | 33.46             | 15.15             | 4.06              | 0.60              |
|            | 100              | 79.46             | 66.24             | 51.37             | 32.89             | 14.42             | 3.56              | 0.48              |
|            | 150              | 79.35             | 65.98             | 45.89             | 31.80             | 13.51             | 3.19              | 0.35              |
|            | 200              | 79.34             | 65.69             | 50.18             | 30.92             | 12.64             | 2.67              | 0.26              |

76  
77

78 **Table S3.** Coefficients,  $R^2$ , RMSE and bias for the models used to estimate AGB from MCH without and with wood  
 79 density (WD) as a weighting factor

| Model           | Equation                   | a    | b    | $R^2$ | RMSE  | Bias  | $R^2$<br>cross-val | RMSE<br>cross-val | Bias<br>cross-val |
|-----------------|----------------------------|------|------|-------|-------|-------|--------------------|-------------------|-------------------|
| <b>m_MCH</b>    | AGB = aMCH <sup>b</sup>    | 0.91 | 1.77 | 0.68  | 54.76 | -0.30 | 0.67               | 55.38             | -0.54             |
| <b>m_MCH_wd</b> | AGB = aWDxMCH <sup>b</sup> | 4.16 | 1.44 | 0.80  | 42.52 | -0.13 | 0.80               | 43.49             | -0.21             |

80  
 81  
 82

83

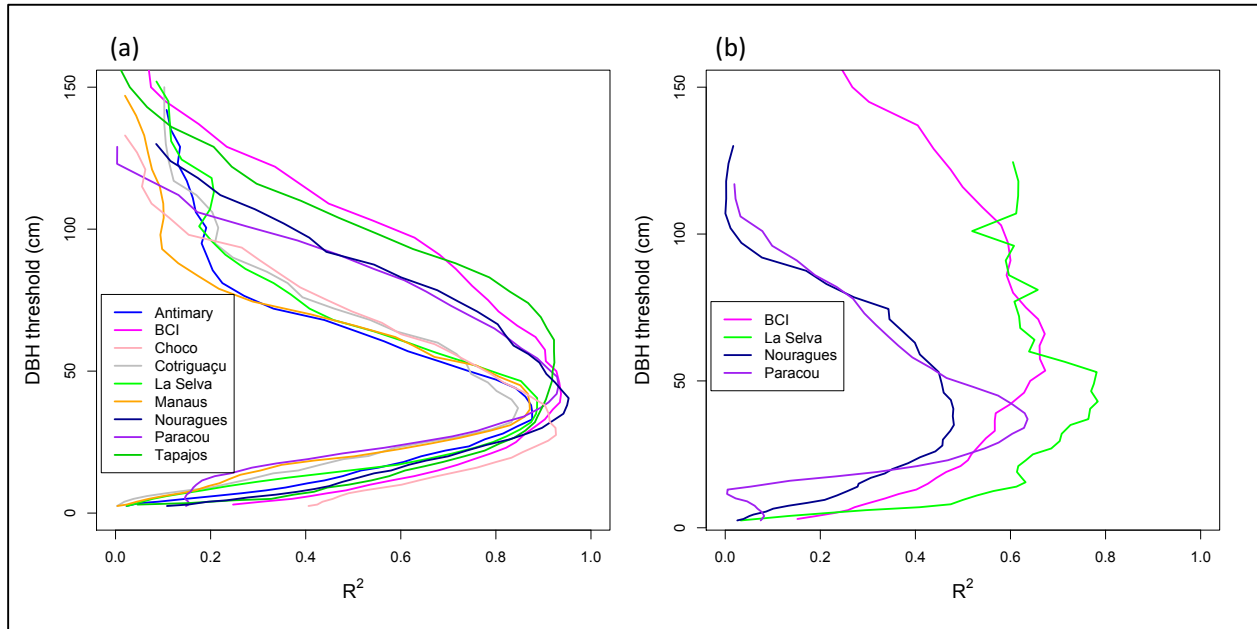

84

85 **Figure S4.** Distribution of  $R^2$  between DBH thresholds and  $AGB_{Local}$  in 1 ha subareas (a) and  $AGB_{inv}$  in 1 ha inventory  
86 plots (b). DBH was calculated from tree height using Chave's E factor model (Chave et al., 2014)  
87

88

### 89 **S.3 LCA and ground data**

90 We looked at the relation between LCA and other stand level metrics:  $AGB_{inv}$  of large trees,  
91 stand basal area, Lorey's height ( $H_L$ ), and the number of large trees. Lorey's height is defined by

92  $H_L = \frac{\sum_{i=1}^N BA_i H_i}{\sum_{i=1}^N BA_i}$  where  $H_i$  is the height of stem  $i$ , and  $BA_i$  is the basal area of stem  $i$ . Weighting

93 tree height with basal area increases the relative importance of large trees in a stand (Lefsky,  
94 2010).

95 There was a significant correlation between LCA and  $AGB_{inv}$  in all calibration sites ( $R^2_{max} = 0.77$ ,

96 in La Selva), and even more so between LCA and  $AGB_{inv}$  of large trees ( $R^2_{max} = 0.83$  in La

97 Selva) (Table S4). LCA correlated with Lorey's height, especially at La Selva but less so at

98 Nouragues ( $R^2_{LaSelva} = 0.86$ ,  $R^2_{Nouragues} = 0.21$ ). We also found that LCA and total basal area are

99 correlated. The relationship between LCA and the number of large trees is significant in all sites,

100 but it is lower than other structural metrics in Paracou ( $R^2 = 0.32$ ). Among study sites, La Selva

101 and BCI show higher correlations between LCA and ground derived metrics. The strong

102 correlation of LCA with plot level  $AGB_{inv}$  as well as with  $AGB_{inv}$  of large trees suggested that a

103 model based on LCA can be used as an estimator of AGB.

104

105 **Table S4.** Coefficients of correlation ( $R^2$ ) between LCA and ground data derived metrics :  $AGB_{inv}$ ,  $AGB_{inv}$  of trees  $\geq$   
 106 50 cm DBH, basal area, Lorey's height and number of large trees in BCI, La Selva, Nouragues and Paracou.

|                               | <b>BCI</b> | <b>La Selva</b> | <b>Nouragues</b> | <b>Paracou</b> |
|-------------------------------|------------|-----------------|------------------|----------------|
| <b><math>AGB_{inv}</math></b> | 0.64       | 0.77            | 0.48             | 0.64           |
| <b><math>AGB_{50}</math></b>  | 0.68       | 0.83            | 0.47             | 0.69           |
| <b>BA</b>                     | 0.63       | 0.53            | 0.41             | 0.43           |
| <b>LH</b>                     | 0.57       | 0.86            | 0.21             | 0.63           |
| <b><math>N_{70}</math></b>    | 0.64       | 0.76            | 0.46             | 0.32           |

107

108

#### 109 **S.4 Contribution of Large Trees to $AGB_{inv}$**

110 First, we explored the role of WD as a key variable in allometric models to scale the tree volume  
111 or size to  $AGB_{inv}$  (Brown et al., 1989; Chave et al., 2005; Chave et al., 2014, Ngomanda et al.,  
112 2014). We examined the variations of WD as a function of DBH classes in all sites and for all  
113 trees greater than 10 cm arranged in 10 cm DBH bins.

114 We then assessed the proportion of large trees by examining the DBH frequency distribution of  
115 trees at different sites using the field inventory data, and compared it to the distribution of  
116  $AGB_{inv}$  for the same DBH ranges, using 1 cm bins to create DBH classes.

#### 117 **Results**

118 DBH and WD: At BCI, mean WD decreased significantly with increasing DBH ( $p < 0.001$ ,  $R^2 =$   
119  $0.92$ ), which is consistent with the results of a previous study (Chave et al., 2004). On the  
120 contrary, at Chocó, mean WD increased significantly with increasing DBH ( $p < 0.001$ ,  $R^2 = 0.8$ ).  
121 No significant trend was found at the other study sites (Fig. S5). These results show that stand  
122 average WD and WD of large trees are not significantly different in four sites and can therefore  
123 be used interchangeably in a model using these data. However, using one or the other will have  
124 an impact on the results of a model calibrated using data from BCI or Chocó. Mean WD of trees  
125  $\geq 50$  cm is 0.49 in BCI (vs. stand average WD =  $0.54 \text{ g cm}^{-3}$ ) and 0.66 in Chocó (vs. stand  
126 average WD =  $0.60 \text{ g cm}^{-3}$ ).

127

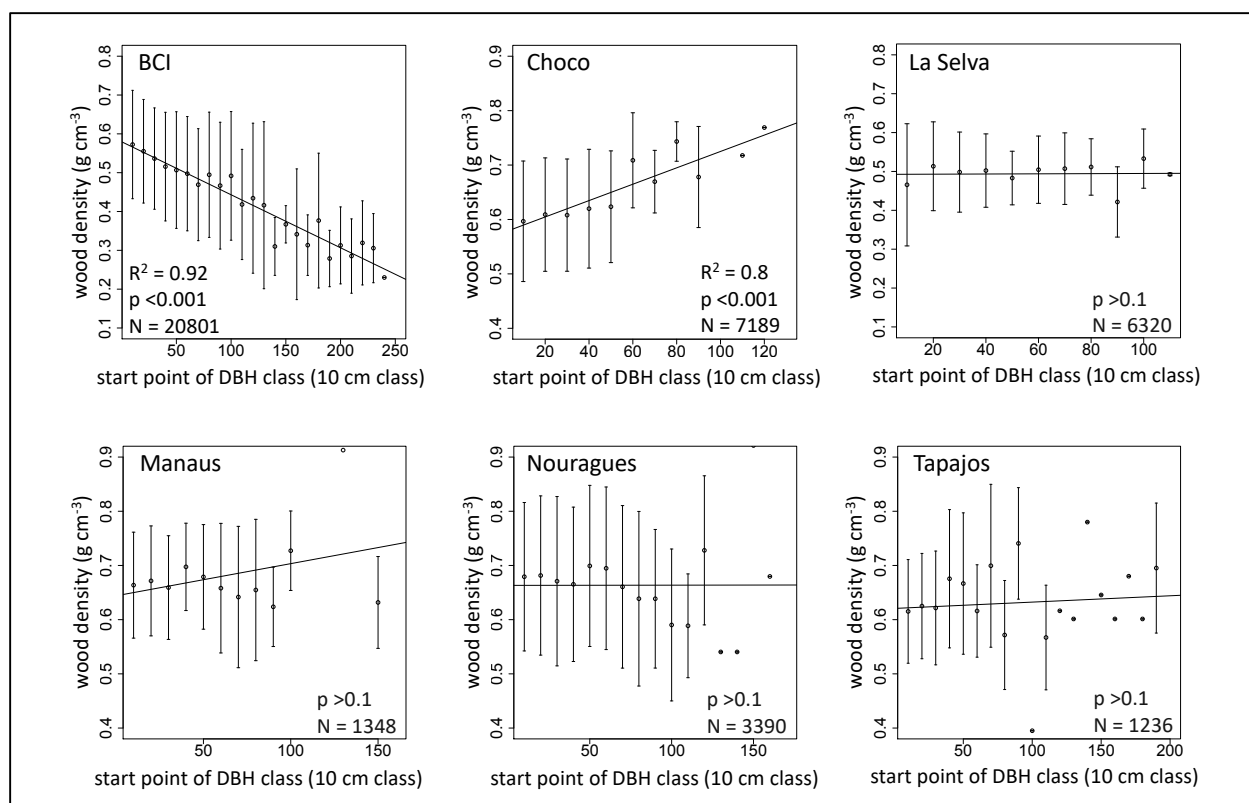

128

129 **Figure S5.** Wood density and DBH classes in BCI, Chocó, La Selva, Manaus, Nouragues and Tapajós. The decrease  
 130 in mean wood density is significant in BCI ( $p < 0.001$ ,  $R^2 = 0.92$ ). The increase in mean wood density is significant  
 131 in Chocó ( $p < 0.001$ ,  $R^2 = 0.8$ ) but there is no significant wood density change across DBH classes in the other sites  
 132 ( $p > 0.1$ ). Points with no standard deviation bars mean that only one tree was present in the class.

133

134 We found that using mean WD of trees  $\geq 50$  cm DBH in our LCA model gives slightly better

135 results than using mean WD (see Eq. (3)), with  $R^2$  of 0.78, RMSE of 45.34 Mg ha<sup>-1</sup> and bias of -

136 0.36 Mg ha<sup>-1</sup>.

137

138 DBH and AGB : The relationship between  $AGB_{inv}$  and the DBH frequency distribution was

139 similar in BCI, La Selva, Nouragues and Tapajós (Fig. S6). In these sites, more than 50 % of the

140 total  $AGB_{inv}$  was contributed by around 5 % (between 3 % and 6 %) of the stems, corresponding

141 to a threshold DBH of 58 cm, 50 cm, 55 cm and 61 cm respectively for the four study sites.

142 Similar results were found in a recent study focusing on the contribution on large trees to AGB

143 in Central Africa (Bastin et al., 2015). Also, 80 % of the AGB stock was in trees with  $DBH \geq 30$

144 cm DBH at BCI, 26 cm at La Selva, 32 cm at Nouragues and 29 cm at Tapajós, which echoes

145 results published on BCI (Chave et al., 2001). These represent only 20 % of the total number of  
 146 trees in each site (only 15 % in Tapajós). Chocó and Manaus had far less large trees, 50 % of  
 147 their total AGB<sub>inv</sub> being explained by respectively 10 % and 7 % of the total number of trees,  
 148 corresponding to a DBH greater than only 28 cm and 40 cm. In these two sites, 80 % of AGB<sub>inv</sub>  
 149 is found in trees above 17 cm and 23 cm, respectively, representing 37 % and 31 % of their total  
 150 number of trees. These findings corroborate with previous studies from other sites and suggests  
 151 that large trees can explain AGB variations and could potentially be used to estimate biomass  
 152 without having to measure all trees in a plot (Bastin et al., 2015; Slik et al., 2013). Note that  
 153 some ground data from Manaus and Nouragues were included in Silk et al.'s dataset).

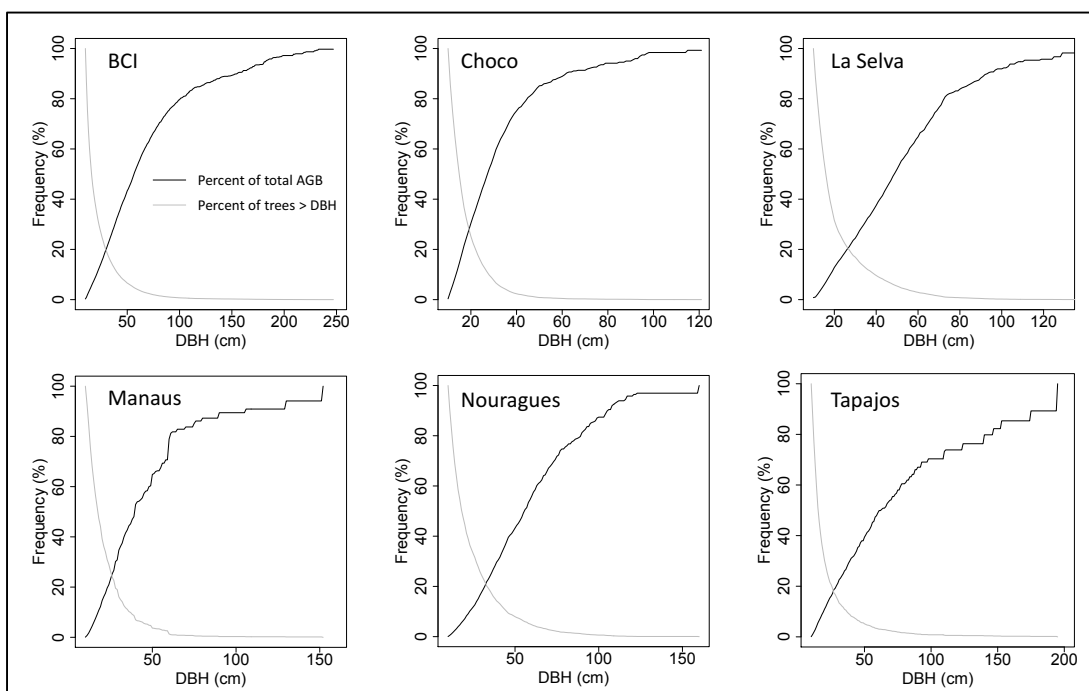

154  
 155 **Figure S6.** Cumulation of AGB<sub>inv</sub> and of number of trees (total number of trees  $\geq 10$  cm DBH) as a function of DBH  
 156 in BCI, Chocó, La Selva, Manaus, Nouragues and Tapajós plots.  
 157

158  
 159 **References (Supplement)**  
 160

161 Chave, J., Riéra, B., and Dubois, M. A.: Estimation of biomass in a neotropical forest of French  
 162 Guiana: spatial and temporal variability. *J. Trop. Ecol.*, 17(01), 79-96, 2001.  
 163



164 Chave, J., Andalo, C., Brown, S., Cairns, M., Chambers, J., Eamus, D., Folster, H., Fromard, F.,  
165 Higuchi, N., Kira, T., Lescure, J. P., Nelson, B., Ogawa, H., Puig, H., Riéra, B., and Yamakura,  
166 T.: Tree allometry and improved estimation of carbon stocks and balance in tropical forests.  
167 *Oecologia*, 145, 87–99, 2005.

168  
169 Chave, J., Coomes D. A., Jansen S, Lewis, S. L., Swenson, N. G. and Zanne, A. E.: Towards a  
170 worldwide wood economics spectrum. *Ecol. Lett.* 12(4), 351-366.  
171 <http://dx.doi.org/10.1111/j.1461-0248.2009.01285.x>, 2009.

172  
173 Duque, A., Saldarriaga, J., Meyer, V., and Saatchi, S.: Structure and allometry in tropical forests  
174 of Chocó, Colombia. *Forest Ecol. Manag.*, 405, 309-318, 2017.

175  
176 Feldpausch, T. R., Lloyd, J., Lewis, S. L., Brienen, R. J., Gloor, M., Monteagudo Mendoza, A.,  
177 Lopez-Gonzalez, G., Banin, L., Abu Salim, K., Affum-Baffoe, K. and Alexiades, M.: Tree height  
178 integrated into pantropical forest biomass estimates. *Biogeosciences*, 3381-3403, 2012.

179  
180 Hagolle, O., Lobo, A., Maisongrande, P., Cabot, F., Duchemin, B. and De Pereyra, A.: Quality  
181 assessment and improvement of temporally composited products of remotely sensed imagery by  
182 combination of VEGETATION 1 and 2 images, *Remote Sens. Environ.*, 94, 172–186,  
183 doi:10.1016/j.rse.2004.09.008, 2005.

184  
185 Lefsky, M. A.: A global forest canopy height map from the Moderate Resolution Imaging  
186 Spectroradiometer and the Geoscience Laser Altimeter System, *Geophys. Res. Lett.*, 37, L15401,  
187 doi:10.1029/2010GL043622, 2010.

188  
189 Ngomanda, A., Obiang, N. L. E., Lebamba, J., Mavouroulou, Q. M., Gomat, H., Mankou, G. S.  
190 and Picard, N.: Site-specific versus pantropical allometric equations: Which option to estimate the  
191 biomass of a moist central African forest?. *Forest Ecol. Manag.*, 312, 1-9., 2014.

192  
193 Zanne, A. E., Lopez-Gonzalez, G., Coomes, D. A., Ilic, J., Jansen, S., Lewis, S. L., Miller, R. B.,  
194 Swenson, N. G., Wiemann, M. C., and Chave, J.: Global wood density database. *Dryad*. Identifier:  
195 <http://hdl.handle.net/10255/dryad.235>, 2009.

196  
197  
198
